# Supplementary material for: Tea Drinking and Its Association with Active Tuberculosis Incidence among Middle-Aged and Elderly Adults: The Singapore Chinese Health Study
Source: MDPI journal article supplement (doi:10.3390/nu9060544), 2017-05-25
Supplement: s1 [file s1]

# Tea Drinking and Its Association with Active Tuberculosis Incidence among Middle-Aged and Elderly Adults: The Singapore Chinese Health Study

Avril Zixin Soh, An Pan, Cynthia Bin Eng Chee, Yee-Tang Wang, Jian-Min Yuan and Woon-Puay Koh

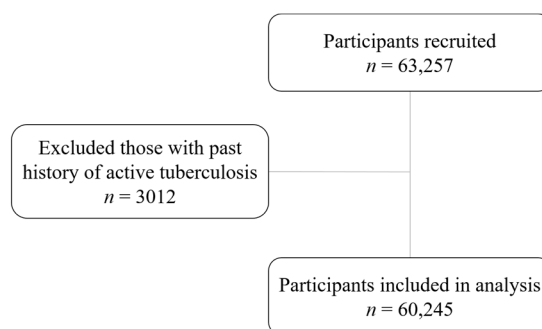

**Supplementary Figure S1.** Flow diagram of participants included in the final analysis.

**Supplementary Table S1.** Baseline characteristics of daily tea drinkers by different types of tea <sup>1</sup>.

| Characteristics                      | Daily Black Tea Drinkers | Daily Green Tea Drinkers |
|--------------------------------------|--------------------------|--------------------------|
| No. of participants (%)              | 6640 (49.5)              | 7485 (55.8)              |
| Daily black tea drinkers             |                          | 1271 (17.0)              |
| Daily green tea drinkers             | 1271 (19.1)              |                          |
| Age at interview (years)             | 55.2 ± 7.6               | 56.9 ± 8.0               |
| Body mass index (kg/m <sup>2</sup> ) | 23.3 ± 3.3               | 23.7 ± 3.3               |
| Men                                  | 4046 (60.9)              | 4047 (54.1)              |
| Dialect                              |                          |                          |
| Cantonese                            | 2982 (44.9)              | 4338 (58.0)              |
| Hokkien                              | 3658 (55.1)              | 3147 (42.0)              |
| Level of education                   |                          |                          |
| No formal education                  | 1161 (17.5)              | 1414 (18.9)              |
| Primary school (1–6 years)           | 2832 (42.7)              | 3480 (46.5)              |
| Secondary school and above           | 2647 (39.9)              | 2591 (34.6)              |
| Smoking status                       |                          |                          |
| Never                                | 4235 (63.8)              | 4891 (65.3)              |
| Former                               | 845 (12.7)               | 1086 (14.5)              |
| Current                              | 1560 (23.5)              | 1508 (20.2)              |
| Alcohol intake                       |                          |                          |
| None                                 | 5087 (76.6)              | 5762 (77.0)              |
| Monthly                              | 554 (8.3)                | 653 (8.7)                |
| Weekly                               | 709 (10.7)               | 751 (10.0)               |
| Daily                                | 290 (4.4)                | 319 (4.3)                |
| Baseline history of diabetes         | 511 (7.7)                | 891 (11.9)               |

<sup>1</sup> Data shown are *n* (%) for categorical variables and mean ± SD for continuous variables.

**Supplementary Table S2.** Baseline characteristics of participants who developed active tuberculosis (TB) and those who remained free of TB <sup>1</sup>.

| Characteristics                    | TB Cases (n = 1249) | Non-Cases (n = 58,996) | p-Value |
|------------------------------------|---------------------|------------------------|---------|
| Age at recruitment, years          | 59.3 ± 7.9          | 56.3 ± 8.0             | <0.001  |
| Body mass index, kg/m <sup>2</sup> | 22.2 ± 3.5          | 23.2 ± 3.3             | <0.001  |
| Men                                | 915 (73.3)          | 24,999 (42.4)          | <0.001  |
| Dialect group                      |                     |                        |         |
| Cantonese                          | 539 (43.2)          | 27,438 (46.5)          |         |
| Hokkien                            | 710 (56.9)          | 31,558 (53.5)          | 0.02    |
| Level of education                 |                     |                        |         |
| No formal education                | 308 (24.7)          | 16,302 (27.6)          |         |
| Primary school (1–6 years)         | 667 (53.4)          | 25,849 (43.8)          |         |
| Secondary school and above         | 274 (21.9)          | 16,845 (28.6)          | <0.001  |
| Smoking status                     |                     |                        |         |
| Never smoker                       | 534 (42.8)          | 41,898 (71.0)          |         |
| Former smoker                      | 175 (14.0)          | 6262 (10.6)            |         |
| Current smoker                     | 540 (43.2)          | 10,836 (18.4)          | <0.001  |
| History of diabetes                | 175 (14.0)          | 5226 (8.9)             | <0.001  |
| Alcohol intake                     |                     |                        |         |
| None                               | 944 (75.6)          | 48,106 (81.5)          |         |
| Monthly                            | 92 (7.4)            | 4237 (7.2)             |         |
| Weekly                             | 116 (9.3)           | 4720 (8.0)             |         |
| Daily                              | 97 (7.8)            | 1933 (3.3)             | <0.001  |

<sup>1</sup> Data shown are *n* (%) for categorical variables and mean ± SD for continuous variables. *p*-value by Student's *t*-test (continuous variables) or chi-square test (categorical variables).

**Supplementary Table S3.** Baseline factors in relation to risk of active tuberculosis.

| Characteristics                    | HR (95% CI) <sup>1</sup> | HR (95% CI) <sup>2</sup> |
|------------------------------------|--------------------------|--------------------------|
| Age at recruitment, years          | 1.06 (1.06–1.07)         | 1.06 (1.05–1.06)         |
| Body mass index, kg/m <sup>2</sup> |                          | 0.92 (0.90–0.93)         |
| Year of recruitment                |                          |                          |
| 1993–1995                          | 1.00                     | 1.00                     |
| 1996–1998                          | 0.85 (0.75–0.97)         | 0.86 (0.76–0.98)         |
| Gender                             |                          |                          |
| Men                                | 1.00                     | 1.00                     |
| Women                              | 0.24 (0.21–0.27)         | 0.30 (0.25–0.35)         |
| Dialect group                      |                          |                          |
| Cantonese                          | 1.00                     | 1.00                     |
| Hokkien                            | 1.08 (0.96–1.21)         | 1.01 (0.90–1.13)         |
| Level of education                 |                          |                          |
| No formal                          |                          | 1.00                     |
| Primary school (1–6 years)         |                          | 0.97 (0.84–1.13)         |
| Secondary school and above         |                          | 0.72 (0.59–0.86)         |
| Smoking status and intensity       |                          |                          |
| Never                              |                          | 1.00                     |
| Former 1–12 cig/day                |                          | 1.41 (1.10–1.80)         |
| Former 13–22 cig/day               |                          | 0.92 (0.68–1.25)         |
| Former 23+ cig/day                 |                          | 0.92 (0.68–1.26)         |
| Current 1–12 cig/day               |                          | 1.87 (1.57–2.23)         |
| Current 13–22 cig/day              |                          | 2.29 (1.93–2.71)         |
| Current 23+ cig/day                |                          | 2.55 (2.05–3.17)         |
| Baseline history of diabetes       |                          |                          |
| No                                 |                          | 1.00                     |
| Yes                                |                          | 2.22 (1.88–2.61)         |

| Alcohol intake |                  |
|----------------|------------------|
| None           | 1.00             |
| Monthly        | 0.86 (0.69–1.07) |
| Weekly         | 0.84 (0.69–1.02) |
| Daily          | 1.32 (1.06–1.64) |

<sup>1</sup> HR = hazard ratio, CI = confidence interval. Model 1 was adjusted for age at recruitment (years), year of recruitment (1993–1995, 1996–1998), gender, dialect group (Hokkien, Cantonese), tea intake (none, monthly, weekly, daily); <sup>2</sup> Further adjusted for education level (no formal education, primary school, secondary school or higher), body mass index (kg/m<sup>2</sup>, continuous) baseline history of diabetes (yes, no), smoking status and intensity (never, former 1–12 cig/day, former 13–22 cig/day, former 23+ cig/day, current 1–12 cig/day, current 13–22 cig/day, current 23+ cig/day), alcohol intake (none, monthly, weekly, daily).
